# Supplementary material for: Acetyl-dl-leucine in cerebellar ataxia ([18F]-FDG-PET study): how does a cerebellar disorder influence cortical sensorimotor networks?
Source: PubMed Central journal article supplement (PMC9813104; doi:10.1007/s00415-022-11252-2), 2022-07-25
Supplement: 415_2022_11252_MOESM3_ESM.pdf [file 415_2022_11252_MOESM3_ESM.pdf]

| <b>PET A (before treatment) vs. healthy controls</b>                  |            |            |            |            |                |                |
|-----------------------------------------------------------------------|------------|------------|------------|------------|----------------|----------------|
| <b>Area</b>                                                           | <b>R/L</b> | <b>X</b>   | <b>Y</b>   | <b>Z</b>   | <b>T-value</b> | <b>Cluster</b> |
| <b>Occipital Pole, Visual cortex V2, BA 18</b>                        | <b>R</b>   | <b>30</b>  | <b>-92</b> | <b>16</b>  | <b>6,13</b>    | <b>539</b>     |
| Visual cortex V1 BA 17                                                |            | 14         | -88        | 18         | 5,53           |                |
| Visual cortex V3/V4/V2, BA 18                                         |            | 38         | -88        | 14         | 5,28           |                |
| <b>Visual cortex V1</b>                                               | <b>R</b>   | <b>22</b>  | <b>-98</b> | <b>-18</b> | <b>4,31</b>    | <b>61</b>      |
| <b>Lateral occipital cortex, inferior division, Visual cortex V5</b>  | <b>R</b>   | <b>52</b>  | <b>-70</b> | <b>-4</b>  | <b>4,91</b>    | <b>229</b>     |
| Visual cortex V4, V3                                                  |            | 40         | -80        | -16        | 4,50           |                |
| <b>Occipital pole, Visual cortex V2/V1</b>                            | <b>L</b>   | <b>-12</b> | <b>-94</b> | <b>12</b>  | <b>3,78</b>    | <b>22</b>      |
| <b>Lateral occipital cortex, Visual Cortex V2</b>                     | <b>L</b>   | <b>-30</b> | <b>-90</b> | <b>14</b>  | <b>4,56</b>    | <b>89</b>      |
| <b>Lateral occipital cortex, inferior division, Visual cortex V5</b>  | <b>L</b>   | <b>-40</b> | <b>-72</b> | <b>-4</b>  | <b>5,26</b>    | <b>414</b>     |
| Visual cortex V4, V3, V2                                              |            | -36        | -88        | -14        | 4,32           |                |
| Visual cortex V4, V3, V2                                              |            | -36        | -88        | -8         | 4,07           |                |
| <b>Inferior parietal lobule, supramarginal gyrus</b>                  | <b>L</b>   | <b>-58</b> | <b>-30</b> | <b>38</b>  | <b>4,91</b>    | <b>122</b>     |
| Postcentral gyrus, primary sensory cortex                             |            | -54        | -22        | 46         | 4,19           |                |
| <b>Premotor cortex, precentral gyrus BA 6</b>                         | <b>L</b>   | <b>-54</b> | <b>4</b>   | <b>34</b>  | <b>4,52</b>    | <b>221</b>     |
| Precentral cortex, corticospinal tract                                |            | -44        | -2         | 32         | 4,01           |                |
| Pre-/postcentral cortex, primary motor, primary somatosensory cortex  |            | -52        | -8         | 40         | 3,99           |                |
| <b>Postcentral gyrus, secondary somatosensory, OP4</b>                | <b>L</b>   | <b>-62</b> | <b>-18</b> | <b>22</b>  | <b>3,72</b>    | <b>16</b>      |
| <b>Middle /superior temporal gyrus, posterior division, BA 20/22</b>  | <b>R</b>   | <b>64</b>  | <b>-24</b> | <b>-6</b>  | <b>6,06</b>    | <b>476</b>     |
| Middle temporal gyrus, posterior division                             |            | 60         | -16        | -24        | 4,53           |                |
| Middle temporal gyrus, posterior division                             |            | 60         | -12        | -16        | 3,89           |                |
| <b>Middle temporal gyrus, anterior division</b>                       | <b>R</b>   | <b>54</b>  | <b>6</b>   | <b>-38</b> | <b>5,62</b>    | <b>89</b>      |
| <b>Inferior temporal gyrus, temporooccipital part</b>                 | <b>R</b>   | <b>56</b>  | <b>-52</b> | <b>-14</b> | <b>3,95</b>    | <b>36</b>      |
| <b>Middle / superior temporal gyrus, posterior division, BA 20/22</b> | <b>L</b>   | <b>-64</b> | <b>-24</b> | <b>-10</b> | <b>3,99</b>    | <b>187</b>     |
| Superior temporal gyrus                                               |            | -50        | -12        | -12        | 3,91           |                |
| <b>Middle temporal gyrus, posterior division</b>                      | <b>L</b>   | <b>-60</b> | <b>-40</b> | <b>-6</b>  | <b>3,75</b>    | <b>15</b>      |
| <b>Inferior temporal gyrus, posterior division</b>                    | <b>L</b>   | <b>-54</b> | <b>-42</b> | <b>-22</b> | <b>3,50</b>    | <b>72</b>      |
| <b>Supramarginal/superior temporal gyrus</b>                          | <b>L</b>   | <b>-58</b> | <b>-42</b> | <b>12</b>  | <b>4,04</b>    | <b>64</b>      |
| Inferior temporal gyrus, posterior division                           |            | -54        | -42        | -24        | 3,26           |                |
| <b>Anterior insula cortex</b>                                         | <b>L</b>   | <b>-26</b> | <b>16</b>  | <b>-12</b> | <b>3,51</b>    | <b>59</b>      |
| <b>Frontal Pole</b>                                                   | <b>L</b>   | <b>-40</b> | <b>38</b>  | <b>-10</b> | <b>4,63</b>    | <b>111</b>     |
| <b>Frontal Pole</b>                                                   | <b>R</b>   | <b>30</b>  | <b>44</b>  | <b>-8</b>  | <b>3,90</b>    | <b>50</b>      |
| <b>Healthy controls v. PET A (before treatment)</b>                   |            |            |            |            |                |                |
| <b>Area</b>                                                           | <b>R/L</b> | <b>X</b>   | <b>Y</b>   | <b>Z</b>   | <b>T-value</b> | <b>Cluster</b> |
| <b>Temporal Pole / inferior frontal gyrus</b>                         | <b>R</b>   | <b>56</b>  | <b>8</b>   | <b>-4</b>  | <b>3,78</b>    | <b>57</b>      |
| <b>Optic radiation / lateral occipital cortex</b>                     | <b>R</b>   | <b>36</b>  | <b>-60</b> | <b>18</b>  | <b>4,28</b>    | <b>60</b>      |
| <b>Optic radiation / lateral occipital cortex</b>                     | <b>L</b>   | <b>-34</b> | <b>-56</b> | <b>14</b>  | <b>3,58</b>    | <b>57</b>      |
| <b>Parahippocampal gyrus</b>                                          | <b>R</b>   | <b>14</b>  | <b>-8</b>  | <b>-32</b> | <b>3,61</b>    | <b>51</b>      |
| <b>Parahippocampal gyrus</b>                                          | <b>L</b>   | <b>-8</b>  | <b>-12</b> | <b>-38</b> | <b>4,68</b>    | <b>59</b>      |
| <b>Cerebellum (I-IV, V)</b>                                           | <b>R</b>   | <b>14</b>  | <b>-44</b> | <b>-18</b> | <b>3,88</b>    | <b>38</b>      |

Supplementary Table 1

| <b>PET B (on treatment) vs. healthy controls</b>                              |            |            |            |            |                |                |
|-------------------------------------------------------------------------------|------------|------------|------------|------------|----------------|----------------|
| <b>Area</b>                                                                   | <b>R/L</b> | <b>X</b>   | <b>Y</b>   | <b>Z</b>   | <b>T-value</b> | <b>Cluster</b> |
| <b>Occipital pole, Visual cortex V1/V2, BA 17/18</b>                          | <b>R</b>   | <b>20</b>  | <b>-98</b> | <b>-16</b> | <b>4,27</b>    | <b>33</b>      |
| <b>Occipital pole, Visual cortex V2, BA 18</b>                                | <b>R</b>   | <b>18</b>  | <b>-92</b> | <b>18</b>  | <b>6,3</b>     | <b>719</b>     |
| Lateral occipital cortex, superior division                                   |            | 38         | -88        | 16         | 5,72           |                |
| Lateral occipital cortex, superior division                                   |            | 16         | -86        | 30         | 4,70           |                |
| <b>Lateral occipital cortex, Visual cortex V4/V3</b>                          | <b>R</b>   | <b>40</b>  | <b>-80</b> | <b>-16</b> | <b>4,87</b>    | <b>251</b>     |
| Lateral occipital cortex, Visual cortex V5                                    |            | 50         | -70        | -8         | 4,70           |                |
| <b>Occipital pole, Visual cortex V2, BA18</b>                                 | <b>L</b>   | <b>-28</b> | <b>-90</b> | <b>16</b>  | <b>5,33</b>    | <b>225</b>     |
| Occipital pole, Visual cortex V2/V1, BA17/18                                  |            | -12        | -94        | 12         | 4,04           |                |
| <b>Lateral occipital cortex, Visual cortex V5</b>                             | <b>L</b>   | <b>-40</b> | <b>-72</b> | <b>-4</b>  | <b>5,24</b>    | <b>520</b>     |
| Lateral occipital cortex, Visual cortex V3/V4                                 |            | -40        | -86        | -14        | 4,91           |                |
| Inferior temporal gyrus, temporooccipital part                                |            | -50        | -62        | -10        | 3,88           |                |
| <b>Middle temporal gyrus, posterior division</b>                              | <b>R</b>   | <b>64</b>  | <b>-20</b> | <b>-10</b> | <b>5,84</b>    | <b>408</b>     |
| Superior/middle temporal gyrus, superior division                             |            | 62         | -30        | 2          | 4,92           |                |
| Secondary somatosensory cortex, parietal operculum OP1                        |            | 62         | -22        | 22         | 4,23           |                |
| <b>Inferior/middle temporal gyrus,</b>                                        | <b>R</b>   | <b>54</b>  | <b>-54</b> | <b>-8</b>  | <b>4,11</b>    | <b>73</b>      |
| Angular gyrus/inferior parietal lobule                                        |            | 56         | -52        | 16         | 4,09           |                |
| <b>Middle temporal gyrus, posterior division</b>                              | <b>L</b>   | <b>-64</b> | <b>-24</b> | <b>-10</b> | <b>5,52</b>    | <b>580</b>     |
| Superior temporal gyrus, posterior division                                   |            | -62        | -16        | -6         | 5,38           |                |
| Superior/middle temporal gyrus, posterior division, acoustic cortex/radiation |            | -52        | -16        | -10        | 4,79           |                |
| <b>Inferior parietal lobule, supramarginal gyrus</b>                          | <b>L</b>   | <b>-56</b> | <b>-44</b> | <b>22</b>  | <b>4,63</b>    | <b>102</b>     |
| Planum temporale, auditory cortex                                             |            | -48        | -34        | 8          | 4,02           |                |
| <b>Inferior temporal gyrus, posterior division</b>                            | <b>L</b>   | <b>-50</b> | <b>-38</b> | <b>-24</b> | <b>6,25</b>    | <b>186</b>     |
| <b>Middle temporal gyrus, posterior division/ temporooccipital part</b>       | <b>L</b>   | <b>-60</b> | <b>-42</b> | <b>-6</b>  | <b>4,72</b>    | <b>47</b>      |
| <b>Postcentral gyrus</b>                                                      | <b>R</b>   | <b>64</b>  | <b>-8</b>  | <b>40</b>  | <b>4,27</b>    | <b>33</b>      |
| Postcentral gyrus, somatosensory cortex, BA 1/2                               |            | 58         | -16        | 50         | 3,73           |                |
| <b>Postcentral gyrus, primary somatosensory cortex BA 1/2</b>                 | <b>L</b>   | <b>-54</b> | <b>-18</b> | <b>46</b>  | <b>4,10</b>    | <b>59</b>      |
| Postcentral gyrus, somatosensory cortex BA 1/2                                |            | -58        | -16        | 36         | 3,62           |                |
| <b>Postcentral gyrus, somatosensory cortex, parietal operculum OP4/1</b>      | <b>L</b>   | <b>-64</b> | <b>-16</b> | <b>22</b>  | <b>4,61</b>    | <b>80</b>      |
| <b>Pre-/postcentral gyrus, motor cortex, BA 4</b>                             | <b>L</b>   | <b>-48</b> | <b>-8</b>  | <b>34</b>  | <b>3,93</b>    | <b>43</b>      |
| <b>Putamen</b>                                                                | <b>L</b>   | <b>-22</b> | <b>20</b>  | <b>-6</b>  | <b>3,87</b>    | <b>14</b>      |
| <b>Frontal Pole</b>                                                           | <b>L</b>   | <b>-40</b> | <b>38</b>  | <b>-10</b> | <b>4,78</b>    | <b>77</b>      |
| <b>Healthy controls vs. PET B (on treatment)</b>                              |            |            |            |            |                |                |
| <b>Area</b>                                                                   | <b>R/L</b> | <b>X</b>   | <b>Y</b>   | <b>Z</b>   | <b>T-value</b> | <b>Cluster</b> |
| <b>Cerebellum (Vermis, VI)</b>                                                | <b>R</b>   | <b>4</b>   | <b>-66</b> | <b>-22</b> | <b>5,16</b>    | <b>887</b>     |
| Cerebellum (I-IV, V)                                                          |            | 12         | -44        | -16        | 5,16           |                |
| Cerebellum (I-IV, V)                                                          |            | 8          | -52        | -12        | 4,58           |                |
| <b>Cerebellum (VIIb/a)</b>                                                    | <b>R</b>   | <b>42</b>  | <b>-52</b> | <b>-58</b> | <b>3,86</b>    | <b>12</b>      |
| <b>Cerebellum (VI/V)</b>                                                      | <b>L</b>   | <b>-24</b> | <b>-50</b> | <b>-30</b> | <b>3,79</b>    | <b>14</b>      |
| <b>Cerebellum (Pontine brainstem)</b>                                         | <b>R</b>   | <b>16</b>  | <b>-50</b> | <b>-38</b> | <b>3,76</b>    | <b>16</b>      |
| <b>Parahippocampal gyrus</b>                                                  | <b>L</b>   | <b>-10</b> | <b>-12</b> | <b>-34</b> | <b>4,73</b>    | <b>98</b>      |
| <b>Thalamus</b>                                                               | <b>R</b>   | <b>14</b>  | <b>-8</b>  | <b>-32</b> | <b>4,27</b>    | <b>52</b>      |
| <b>Thalamus</b>                                                               | <b>R</b>   | <b>8</b>   | <b>-4</b>  | <b>4</b>   | <b>3,93</b>    | <b>12</b>      |
| <b>Optic radiation/callosal body/middle temp. gyr.</b>                        | <b>L</b>   | <b>-30</b> | <b>-48</b> | <b>26</b>  | <b>3,92</b>    | <b>66</b>      |
| <b>Middle temporal gyrus/ inferior parietal lobule</b>                        | <b>R</b>   | <b>42</b>  | <b>-56</b> | <b>10</b>  | <b>4,93</b>    | <b>103</b>     |

Supplementary Table 2

| <b>PET B vs. PET A (on vs. off treatment), 0.001</b> |            |          |          |          |                |                |
|------------------------------------------------------|------------|----------|----------|----------|----------------|----------------|
| <b>Area</b>                                          | <b>R/L</b> | <b>X</b> | <b>Y</b> | <b>Z</b> | <b>T-value</b> | <b>Cluster</b> |
| Supramarginal gyrus                                  | L          | -60      | -46      | 48       | 4,92           | 10             |

  

| <b>PET B vs. PET A (on vs. off treatment), 0.005</b>           |            |          |          |          |                |                |
|----------------------------------------------------------------|------------|----------|----------|----------|----------------|----------------|
| <b>Area</b>                                                    | <b>R/L</b> | <b>X</b> | <b>Y</b> | <b>Z</b> | <b>T-value</b> | <b>Cluster</b> |
| Supramarginal gyrus                                            | L          | -60      | -46      | 48       | 4,92           | 29             |
| Superior temporal gyrus / Secondary somatosensory cortex (OP4) | L          | -66      | -16      | 2        | 3,27           | 112            |
| Middle temporal gyrus / Supramarginal gyrus                    | R          | 48       | -46      | 6        | 3,32           | 18             |
| Anterior intraparietal sulcus                                  | L          | -30      | -36      | 38       | 4,05           | 14             |
| Superior parietal lobule 7                                     | L          | -36      | -60      | 56       | 3,96           | 11             |
| Superior parietal lobule 7                                     | R          | 10       | -62      | 62       | 3,96           | 21             |
| Superior parietal lobule 7                                     | R          | 8        | -48      | 76       | 3,39           | 14             |
| Frontal pole /superior frontal gyrus                           | L          | -22      | 44       | 46       | 3,84           | 62             |
| Superior frontal gyrus / Premotor area, BA 6                   | R          | 24       | 0        | 46       | 3,71           | 32             |
| Premotor cortex, BA 6                                          | L          | -6       | -18      | 44       | 3,66           | 111            |
| Juxtapositional Lobule /Premotor cortex, BA 6                  | L          | -4       | -4       | 58       | 3,57           |                |
| Premotor cortex, BA 6                                          | R          | 12       | -2       | 78       | 4,3            | 36             |
| Middle frontal gyrus                                           | R          | 36       | 34       | 16       | 3,66           | 12             |
| Optic radiation /lateral geniculate body                       | R          | 26       | -24      | -4       | 3,58           | 23             |
| Precuneus Cortex                                               | R          | 0        | -60      | 18       | 3,53           | 36             |
| Visual Cortex (V1, BA17)                                       | R          | 8        | -62      | 10       | 3,34           | 34             |
| Visual cortex (V1, BA17)/optic radiation                       | R          | 30       | -62      | 6        | 4,09           | 51             |
| Cerebellum VI / Nodule                                         | R          | 16       | -62      | -30      | 3,48           | 19             |
| Callosal body                                                  | L          | -6       | -36      | 14       | 3,58           | 13             |

  

| <b>PET A vs. PET B (off vs. on treatment), 0.001</b> |            |          |          |          |                |                |
|------------------------------------------------------|------------|----------|----------|----------|----------------|----------------|
| <b>Area</b>                                          | <b>R/L</b> | <b>X</b> | <b>Y</b> | <b>Z</b> | <b>T-value</b> | <b>Cluster</b> |
| Cerebellum /Crus I                                   | L          | -40      | -70      | -24      | 6,19           | 80             |
| Temporal fusiform/parahippocampal gyrus              | R          | 34       | -14      | -32      | 5,52           | 49             |
| Superior parietal lobule/post/precentral gyrus       | R          | 6        | -36      | 56       | 5,39           | 14             |

  

| <b>PET A vs. PET B (off vs. on treatment), 0.005</b>           |            |          |          |          |                |                |
|----------------------------------------------------------------|------------|----------|----------|----------|----------------|----------------|
| <b>Area</b>                                                    | <b>R/L</b> | <b>X</b> | <b>Y</b> | <b>Z</b> | <b>T-value</b> | <b>Cluster</b> |
| Cerebellum /Crus I                                             | L          | -40      | -70      | -24      | 6,19           | 178            |
| Cerebellum                                                     | L          | -10      | -62      | -32      | 3,43           | 12             |
| Cerebellum/Lingual gyrus (VI, Vermis)                          | R          | 6        | 68       | -12      | 3,50           | 17             |
| Cerebellum (VI, Crus I)                                        | R          | 34       | -62      | -26      | 3,44           | 15             |
| Posterior insular cortex                                       | L          | -36      | -16      | 8        | 3,68           | 12             |
| Posterior insular cortex                                       | R          | 40       | -16      | 12       | 3,62           | 10             |
| Temporal fusiform/parahippocampal gyrus                        | R          | 34       | -14      | -32      | 5,52           | 97             |
| Temporal fusiform/ parahippocampal gyrus                       | R          | 26       | -36      | -24      | 3,53           | 14             |
| Temporal fusiform cortex/parahippocampal gyrus/optic radiation | R          | 30       | -40      | -10      | 3,47           | 17             |
| Middle temporal gyrus                                          | R          | 74       | -36      | -14      | 4,99           | 23             |
| Middle/superior temporal gyrus                                 | R          | 56       | -32      | 0        | 3,42           | 18             |
| Middle/superior temporal gyrus                                 | R          | 58       | -36      | 10       | 3,15           | 11             |
| Superior parietal lobule/post/precentral gyrus                 | R          | 6        | -36      | 56       | 5,39           | 43             |
| Juxtapositional lobule/premotor cortex, BA 6                   | R          | 6        | 0        | 62       | 4,20           | 39             |
| Lateral occipital cortex                                       | L          | -46      | -72      | 20       | 3,39           | 23             |
| Visual cortex /occipital pole V2/3                             | R          | 38       | -94      | -6       | 3,61           | 15             |

Supplementary Table 3

| <b>PET A Responders (before treatment) vs. healthy controls</b> |            |            |             |            |                |                |
|-----------------------------------------------------------------|------------|------------|-------------|------------|----------------|----------------|
| <b>Area</b>                                                     | <b>R/L</b> | <b>X</b>   | <b>Y</b>    | <b>Z</b>   | <b>T-value</b> | <b>Cluster</b> |
| <b>Visual cortex V2, V1, BA 18/17</b>                           | <b>R</b>   | <b>32</b>  | <b>-94</b>  | <b>16</b>  | <b>7,69</b>    | <b>136</b>     |
| Visual cortex V2, V1, BA 17/18                                  |            | 14         | -88         | 18         | 4,28           |                |
| <b>Visual cortex V2, V3, BA 18</b>                              | <b>L</b>   | <b>-30</b> | <b>-990</b> | <b>12</b>  | <b>4,2</b>     | <b>16</b>      |
| <b>Lateral occipital cortex, Visual cortex V5</b>               | <b>R</b>   | <b>54</b>  | <b>-70</b>  | <b>-4</b>  | <b>5,37</b>    | <b>27</b>      |
| <b>Lateral occipital cortex, Visual cortex V5</b>               | <b>L</b>   | <b>-38</b> | <b>-72</b>  | <b>-2</b>  | <b>5,24</b>    | <b>76</b>      |
| <b>Lateral occipital cortex / inferior parietal lobule</b>      | <b>L</b>   | <b>-42</b> | <b>-82</b>  | <b>30</b>  | <b>4,66</b>    | <b>13</b>      |
| <b>Middle temporal gyrus, posterior division, BA 21</b>         | <b>L</b>   | <b>-60</b> | <b>-38</b>  | <b>-6</b>  | <b>6,52</b>    | <b>74</b>      |
| <b>Middle temporal gyrus, posterior division</b>                | <b>L</b>   | <b>-60</b> | <b>-22</b>  | <b>-18</b> | <b>4,23</b>    | <b>27</b>      |
| <b>Planum temporale/superior temporal gyrus</b>                 | <b>R</b>   | <b>62</b>  | <b>-26</b>  | <b>12</b>  | <b>4,77</b>    | <b>127</b>     |
| Middle temporal gyrus, posterior division                       |            | 54         | -24         | -6         | 4,34           |                |
| Planum temporale/superior temporal gyrus                        |            | 54         | -18         | -2         | 4,22           |                |
| <b>Superior temporal gyrus</b>                                  | <b>L</b>   | <b>-58</b> | <b>-38</b>  | <b>10</b>  | <b>6,01</b>    | <b>75</b>      |
| <b>Temporal pole, middle temporal gyrus</b>                     | <b>R</b>   | <b>54</b>  | <b>6</b>    | <b>-38</b> | <b>4,91</b>    | <b>15</b>      |
| <b>Precentral gyrus, primary motor, BA 4</b>                    | <b>L</b>   | <b>-44</b> | <b>-4</b>   | <b>32</b>  | <b>4,99</b>    | <b>196</b>     |
| Precentral gyrus, premotor cortex, BA 6                         |            | -52        | 0           | 34         | 4,90           |                |
| <b>Postcentral gyrus / supramarginal gyrus</b>                  | <b>L</b>   | <b>-54</b> | <b>-26</b>  | <b>40</b>  | <b>4,38</b>    | <b>23</b>      |
| <b>Putamen/Pallidum</b>                                         | <b>L</b>   | <b>-28</b> | <b>10</b>   | <b>4</b>   | <b>6,19</b>    | <b>356</b>     |
| <b>Putamen</b>                                                  | <b>R</b>   | <b>28</b>  | <b>10</b>   | <b>-4</b>  | <b>4,9</b>     | <b>39</b>      |
| <b>Parahippocampal gyrus, posterior division</b>                | <b>L</b>   | <b>-22</b> | <b>-40</b>  | <b>-10</b> | <b>4,75</b>    | <b>24</b>      |
| <b>Frontal pole</b>                                             | <b>R</b>   | <b>30</b>  | <b>56</b>   | <b>34</b>  | <b>4,88</b>    | <b>28</b>      |
| <b>Frontal pole</b>                                             | <b>L</b>   | <b>-40</b> | <b>40</b>   | <b>-8</b>  | <b>4,63</b>    | <b>62</b>      |
| <b>Middle frontal gyrus</b>                                     | <b>L</b>   | <b>-38</b> | <b>20</b>   | <b>38</b>  | <b>4,58</b>    | <b>20</b>      |
| <b>Healthy controls v. PET A Responders (before treatment)</b>  |            |            |             |            |                |                |
| <b>Area</b>                                                     | <b>R/L</b> | <b>X</b>   | <b>Y</b>    | <b>Z</b>   | <b>T-value</b> | <b>Cluster</b> |
| <b>Cerebellum, anterior lobe/culmen, I-IV</b>                   | <b>R</b>   | <b>4</b>   | <b>-54</b>  | <b>-10</b> | <b>8,46</b>    | <b>1145</b>    |
| Cerebellum, anterior lobe/culmen, I-IV                          |            | 2          | -52         | -16        | 6,97           |                |
| Cerebellum, anterior lobe/culmen, V, I-IV                       |            | 16         | -44         | -16        | 5,18           |                |
| <b>Cerebellum Crus II, VIIb</b>                                 | <b>R</b>   | <b>14</b>  | <b>-78</b>  | <b>-46</b> | <b>4,97</b>    | <b>130</b>     |
| <b>Cerebellum VIIb, a, Crus II</b>                              | <b>L</b>   | <b>-8</b>  | <b>-72</b>  | <b>-50</b> | <b>4,56</b>    | <b>50</b>      |
| <b>Cerebellar Crus II,I</b>                                     | <b>R</b>   | <b>22</b>  | <b>-90</b>  | <b>-30</b> | <b>4,54</b>    | <b>21</b>      |
| <b>Cerebellar Crus I,II</b>                                     | <b>L</b>   | <b>-30</b> | <b>-80</b>  | <b>-32</b> | <b>4,42</b>    | <b>44</b>      |
| <b>Cerebellum Crus VI</b>                                       | <b>R</b>   | <b>26</b>  | <b>-68</b>  | <b>-28</b> | <b>4,39</b>    | <b>76</b>      |
| Cerebellum Crus I                                               |            | 42         | -56         | -32        | 3,98           |                |
| <b>Callosal body, cingulate posterior division</b>              | <b>L</b>   | <b>-6</b>  | <b>-44</b>  | <b>18</b>  | <b>6,00</b>    | <b>99</b>      |
| <b>Optic radiation, callosal body</b>                           | <b>L</b>   | <b>-38</b> | <b>-52</b>  | <b>-8</b>  | <b>4,85</b>    | <b>10</b>      |
| <b>Hippocampus</b>                                              | <b>L</b>   | <b>-34</b> | <b>-34</b>  | <b>-10</b> | <b>4,52</b>    | <b>11</b>      |
| <b>Inferior parietal lobule</b>                                 | <b>R</b>   | <b>42</b>  | <b>-58</b>  | <b>18</b>  | <b>4,61</b>    | <b>51</b>      |

Supplementary Table 4

| <b>PET B Responders (on treatment) vs. healthy controls, 0.001</b>              |            |            |            |            |                |                |
|---------------------------------------------------------------------------------|------------|------------|------------|------------|----------------|----------------|
| <b>Area</b>                                                                     | <b>R/L</b> | <b>X</b>   | <b>Y</b>   | <b>Z</b>   | <b>T-value</b> | <b>Cluster</b> |
| <b>Occipital pole, Visual cortex V2/V1, BA 18/17</b>                            | <b>R</b>   | <b>16</b>  | <b>-92</b> | <b>18</b>  | <b>6,46</b>    | <b>576</b>     |
| Lateral occipital cortex, superior division                                     |            | 38         | -88        | 16         | 5,51           |                |
| Occipital pole, Visual cortex V2/V1, BA 18/17                                   |            | 30         | -94        | 14         | 5,51           |                |
| <b>Occipital pole</b>                                                           | <b>R</b>   | <b>20</b>  | <b>-98</b> | <b>-20</b> | <b>4,51</b>    | <b>30</b>      |
| Occipital pole                                                                  |            | 20         | -104       | -10        | 3,89           |                |
| <b>Lateral occipital cortex, inferior division</b>                              | <b>R</b>   | <b>40</b>  | <b>-82</b> | <b>-16</b> | <b>4,66</b>    | <b>58</b>      |
| <b>Lateral occipital cortex, Visual cortex V4/3</b>                             | <b>R</b>   | <b>52</b>  | <b>-74</b> | <b>-4</b>  | <b>4,62</b>    | <b>52</b>      |
| <b>Occipital pole, Visual cortex V2, BA 18</b>                                  | <b>L</b>   | <b>-28</b> | <b>-90</b> | <b>16</b>  | <b>5,44</b>    | <b>703</b>     |
| Lateral occipital cortex, Visual cortex V4/3                                    |            | -40        | -86        | -10        | 5,42           |                |
| Occipital pole, Visual cortex V1/2, BA 17/18                                    |            | -10        | -92        | 12         | 4,52           |                |
| <b>Precuneus /superior parietal lobule</b>                                      | <b>L</b>   | <b>-12</b> | <b>-48</b> | <b>42</b>  | <b>5,15</b>    | <b>20</b>      |
| <b>Middle temporal gyrus, posterior division</b>                                | <b>R</b>   | <b>64</b>  | <b>-20</b> | <b>-10</b> | <b>5,21</b>    | <b>314</b>     |
| Inferior temporal gyrus, posterior division                                     |            | 58         | -18        | -26        | 4,77           |                |
| Middle/inferior temporal gyrus, posterior division                              |            | 60         | -28        | -16        | 4,57           |                |
| <b>Inferior temporal gyrus, temporooccipital part</b>                           | <b>R</b>   | <b>58</b>  | <b>-52</b> | <b>-14</b> | <b>3,95</b>    | <b>22</b>      |
| <b>Middle temporal gyrus, temporooccipital part</b>                             | <b>L</b>   | <b>-58</b> | <b>-46</b> | <b>-6</b>  | <b>6,11</b>    | <b>85</b>      |
| <b>Inferior temporal gyrus, posterior division</b>                              | <b>L</b>   | <b>-50</b> | <b>-38</b> | <b>-24</b> | <b>5,05</b>    | <b>84</b>      |
| <b>Middle/superior temporal gyrus, posterior d.</b>                             | <b>L</b>   | <b>-64</b> | <b>-22</b> | <b>-10</b> | <b>7,11</b>    | <b>679</b>     |
| Superior temp. gyrus, somatosensory cortex, OP 1                                |            | -60        | -26        | 6          | 4,98           |                |
| Supramarginal gyrus/Inferior parietal lobule                                    |            | -58        | -44        | 22         | 4,7            |                |
| <b>Post-/precentral gyrus</b>                                                   | <b>R</b>   | <b>64</b>  | <b>-8</b>  | <b>40</b>  | <b>4,28</b>    | <b>14</b>      |
| <b>Postcentral gyrus, primary somatosensory, BA 1/2</b>                         | <b>R</b>   | <b>58</b>  | <b>-18</b> | <b>50</b>  | <b>4,06</b>    | <b>19</b>      |
| <b>Postcentral gyrus, primary somatosensory, BA 1</b>                           | <b>L</b>   | <b>-54</b> | <b>-14</b> | <b>54</b>  | <b>4,2</b>     | <b>34</b>      |
| Postcentral gyrus, primary somatosensory, BA 1/2)                               |            | -54        | -18        | 44         | 3,91           |                |
| <b>Pre-/postcentral gyrus, primary motor, BA 4; somatosensory, BA 3)</b>        | <b>L</b>   | <b>-46</b> | <b>-8</b>  | <b>34</b>  | <b>4,24</b>    | <b>43</b>      |
| <b>Precentral gyrus, premotor /primary motor, BA 6/4</b>                        |            | <b>-52</b> | <b>-2</b>  | <b>36</b>  | <b>3,7</b>     |                |
| <b>Healthy controls vs. PET B Responders (on treatment)</b>                     |            |            |            |            |                |                |
| <b>Area</b>                                                                     | <b>R/L</b> | <b>X</b>   | <b>Y</b>   | <b>Z</b>   | <b>T-value</b> | <b>Cluster</b> |
| <b>Cerebellar vermis (VIIIa/b, VI; hemisphere VI)</b>                           | <b>L</b>   | <b>-2</b>  | <b>-62</b> | <b>-20</b> | <b>9,29</b>    | <b>1835</b>    |
| Cerebellum I-V                                                                  | R          | 14         | -46        | -12        | 8,3            |                |
| Cerebellum I-V, V                                                               | R          | 6          | -54        | -12        | 8,22           |                |
| <b>Cerebellum, Crus I, VI</b>                                                   | <b>R</b>   | <b>42</b>  | <b>-46</b> | <b>-36</b> | <b>4,37</b>    | <b>30</b>      |
| <b>Middle cerebellar peduncle, VI/V</b>                                         | <b>L</b>   | <b>-22</b> | <b>-48</b> | <b>-30</b> | <b>4,74</b>    | <b>70</b>      |
| <b>Juxtapositional Lobule, supplementary motor cortex/premotor cortex, BA 6</b> | <b>R</b>   | <b>6</b>   | <b>8</b>   | <b>60</b>  | <b>5,18</b>    | <b>137</b>     |
| <b>Middle temporal gyrus/inferior parietal lobule</b>                           | <b>R</b>   | <b>42</b>  | <b>-56</b> | <b>10</b>  | <b>4,79</b>    | <b>70</b>      |
| <b>Intraparietal sulcus/callosal body</b>                                       | <b>L</b>   | <b>-30</b> | <b>-50</b> | <b>28</b>  | <b>5,08</b>    | <b>116</b>     |
| <b>Healthy controls vs. PET B Responders (on treatment), 0.05 corrected</b>     |            |            |            |            |                |                |
| <b>Area</b>                                                                     | <b>R/L</b> | <b>X</b>   | <b>Y</b>   | <b>Z</b>   | <b>T-value</b> | <b>Cluster</b> |
| <b>Cerebellar vermis (VIIIa/b, VI; hemisphere VI)</b>                           | <b>L</b>   | <b>-2</b>  | <b>-62</b> | <b>-20</b> | <b>9,29</b>    | <b>91</b>      |
| Cerebellum I-V, V                                                               | R          | 6          | -54        | -12        | 8,22           |                |

Supplementary Table 5

| <b>Responders PET B vs. PET A (on vs. off treatment), 0.001</b>                 |            |            |            |            |                |                |
|---------------------------------------------------------------------------------|------------|------------|------------|------------|----------------|----------------|
| <b>Area</b>                                                                     | <b>R/L</b> | <b>X</b>   | <b>Y</b>   | <b>Z</b>   | <b>T-value</b> | <b>Cluster</b> |
| <b>Post-/Precentral gyrus, somatosensory, BA 1/premotor BA 6)</b>               | <b>R</b>   | <b>66</b>  | <b>-6</b>  | <b>30</b>  | <b>8,71</b>    | <b>17</b>      |
| <b>Lateral occipital cortex /optic radiation</b>                                | <b>R</b>   | <b>32</b>  | <b>-62</b> | <b>18</b>  | <b>6,24</b>    | <b>20</b>      |
| <b>Juxtapositional lobule cortex, supplementary motor/premotor cortex, BA 6</b> | <b>L</b>   | <b>-6</b>  | <b>-8</b>  | <b>52</b>  | <b>6,03</b>    | <b>27</b>      |
| Juxtapositional lobule cortex, supplementary motor/premotor cortex, BA 6        |            | -8         | -14        | 46         | 4,82           |                |
| <b>Inferior temporal gyrus, posterior division</b>                              | <b>L</b>   | <b>-52</b> | <b>-28</b> | <b>-26</b> | <b>5,77</b>    | <b>12</b>      |
| <b>Juxtapositional lobule cortex, supplementary motor</b>                       | <b>L</b>   | <b>-6</b>  | <b>6</b>   | <b>56</b>  | <b>5,16</b>    | <b>16</b>      |

**Responders PET B vs. PET A (on vs. off treatment), 0.005**

| <b>Area</b>                                                                                    | <b>R/L</b> | <b>X</b>   | <b>Y</b>   | <b>Z</b>   | <b>T-value</b> | <b>Cluster</b> |
|------------------------------------------------------------------------------------------------|------------|------------|------------|------------|----------------|----------------|
| <b>Postcentral gyrus, somatosensory, BA 1/3</b>                                                | <b>R</b>   | <b>66</b>  | <b>-6</b>  | <b>30</b>  | <b>8,71</b>    | <b>39</b>      |
| <b>Postcentral gyrus, somatosensory, BA 1/ inferior parietal lobule, BA 40</b>                 | <b>R</b>   | <b>44</b>  | <b>-36</b> | <b>62</b>  | <b>4,97</b>    | <b>30</b>      |
| <b>Postcentral gyrus, somatosensory, BA 3</b>                                                  | <b>L</b>   | <b>-18</b> | <b>-34</b> | <b>60</b>  | <b>5,39</b>    | <b>10</b>      |
| <b>Juxtapositional lobule cortex, supplementary motor / premotor cortex, BA 6</b>              | <b>L</b>   | <b>-6</b>  | <b>-8</b>  | <b>52</b>  | <b>6,03</b>    | <b>166</b>     |
| Juxtapositional lobule cortex, supplementary motor / premotor cortex, BA 6                     |            | -6         | 6          | 56         | 5,16           |                |
| Juxtapositional lobule cortex, supplementary motor / premotor cortex, BA 6                     |            | -8         | -14        | 46         | 4,82           |                |
| <b>Precentral gyrus / Premotor cortex BA 6</b>                                                 | <b>L</b>   | <b>-44</b> | <b>-12</b> | <b>60</b>  | <b>3,76</b>    | <b>14</b>      |
| <b>Intracalcarine cortex /Visual cortex V1, BA 17</b>                                          | <b>R</b>   | <b>14</b>  | <b>-72</b> | <b>12</b>  | <b>4,81</b>    | <b>136</b>     |
| Intracalcarine cortex / Visual cortex V1/V2                                                    |            | 18         | -62        | 4          | 4,62           |                |
| <b>Optic radiation / occipital white matter / callosal body</b>                                | <b>R</b>   | <b>32</b>  | <b>-62</b> | <b>18</b>  | <b>6,24</b>    | <b>72</b>      |
| <b>Cuneal cortex / Visual cortex V2</b>                                                        | <b>R</b>   | <b>12</b>  | <b>-84</b> | <b>32</b>  | <b>4,26</b>    | <b>18</b>      |
| <b>Angular gyrus / lateral occipital cortex, superior division / inferior parietal lobule</b>  | <b>L</b>   | <b>-46</b> | <b>-58</b> | <b>32</b>  | <b>3,8</b>     | <b>32</b>      |
| <b>Lateral occipital cortex, superior division / superior parietal lobule /precuneus, BA 7</b> | <b>L</b>   | <b>-20</b> | <b>-64</b> | <b>58</b>  | <b>5,92</b>    | <b>44</b>      |
| <b>Lateral occipital cortex, superior division / inferior parietal lobule</b>                  | <b>L</b>   | <b>-24</b> | <b>-82</b> | <b>40</b>  | <b>4,67</b>    | <b>20</b>      |
| <b>Lateral occipital cortex, superior division</b>                                             | <b>R</b>   | <b>34</b>  | <b>-58</b> | <b>38</b>  | <b>4,43</b>    | <b>13</b>      |
| <b>Precuneus</b>                                                                               | <b>R</b>   | <b>12</b>  | <b>-50</b> | <b>36</b>  | <b>4,42</b>    | <b>15</b>      |
| <b>Precuneus</b>                                                                               | <b>R</b>   | <b>0</b>   | <b>-54</b> | <b>14</b>  | <b>4,21</b>    | <b>23</b>      |
| <b>Supramarginal/superior temporal gyrus</b>                                                   | <b>R</b>   | <b>46</b>  | <b>-36</b> | <b>10</b>  | <b>5,22</b>    | <b>28</b>      |
| <b>Inferior temporal gyrus, temporooccipital part</b>                                          | <b>R</b>   | <b>52</b>  | <b>-56</b> | <b>-22</b> | <b>5,13</b>    | <b>10</b>      |
| <b>Inferior temporal gyrus, posterior division</b>                                             | <b>L</b>   | <b>-52</b> | <b>-28</b> | <b>-26</b> | <b>5,77</b>    | <b>36</b>      |
| <b>Middle/inferior frontal cortex</b>                                                          | <b>R</b>   | <b>38</b>  | <b>34</b>  | <b>16</b>  | <b>4,57</b>    | <b>27</b>      |

**Responders PET A vs. PET B (off vs. on treatment), 0.001**

| <b>Area</b>                                                                   | <b>R/L</b> | <b>X</b>   | <b>Y</b>   | <b>Z</b>   | <b>T-value</b> | <b>Cluster</b> |
|-------------------------------------------------------------------------------|------------|------------|------------|------------|----------------|----------------|
| <b>Midline cerebellum / VIIIa</b>                                             | <b>L</b>   | <b>-10</b> | <b>-62</b> | <b>-34</b> | <b>6,01</b>    | <b>15</b>      |
| <b>Posterior insular cortex</b>                                               | <b>L</b>   | <b>-38</b> | <b>-18</b> | <b>6</b>   | <b>5,98</b>    | <b>11</b>      |
| <b>Juxtapositional lobule cortex, supplementary motor/premotor area, BA 6</b> | <b>R</b>   | <b>6</b>   | <b>4</b>   | <b>62</b>  | <b>5,25</b>    | <b>13</b>      |
| <b>Frontal white matter /anterior callosal body</b>                           | <b>L</b>   | <b>-22</b> | <b>36</b>  | <b>14</b>  | <b>5,04</b>    | <b>11</b>      |

**Responders PET A vs. PET B (off vs. on treatment), 0.005**

| <b>Area</b>                         | <b>R/L</b> | <b>X</b>   | <b>Y</b>   | <b>Z</b>   | <b>T-value</b> | <b>Cluster</b> |
|-------------------------------------|------------|------------|------------|------------|----------------|----------------|
| <b>Midline cerebellum /VIIIa</b>    | <b>L</b>   | <b>-10</b> | <b>-62</b> | <b>-34</b> | <b>6,01</b>    | <b>93</b>      |
| <b>Vermis, VIIIa, VIIb, Crus II</b> |            | <b>-4</b>  | <b>-70</b> | <b>-38</b> | <b>4,7</b>     |                |
| <b>Cerebellum, Crus I/VI</b>        | <b>L</b>   | <b>-38</b> | <b>-68</b> | <b>-24</b> | <b>4,38</b>    | <b>31</b>      |

|                                                                             |          |            |            |            |             |           |
|-----------------------------------------------------------------------------|----------|------------|------------|------------|-------------|-----------|
| <i>Midbrain/Pons</i>                                                        | <i>L</i> | <i>-10</i> | <i>-18</i> | <i>-18</i> | <i>5,01</i> | <i>53</i> |
| <i>(Para)hippocampal gyrus /temporal fusiform gyrus</i>                     | <i>R</i> | <i>34</i>  | <i>-14</i> | <i>-28</i> | <i>4,08</i> | <i>54</i> |
| <i>Temporal pole /parahippocampal gyrus</i>                                 | <i>R</i> | <i>22</i>  | <i>4</i>   | <i>-40</i> | <i>3,79</i> | <i>11</i> |
| <i>(Para-)hippocampal gyrus /amygdala</i>                                   | <i>L</i> | <i>-24</i> | <i>-2</i>  | <i>-20</i> | <i>4,48</i> | <i>17</i> |
| <i>Posterior insular cortex</i>                                             | <i>L</i> | <i>-38</i> | <i>-18</i> | <i>6</i>   | <i>5,98</i> | <i>31</i> |
| <i>Occipital fusiform / lingual gyrus, visual cortex V3/4</i>               | <i>L</i> | <i>-26</i> | <i>-66</i> | <i>-6</i>  | <i>5,31</i> | <i>27</i> |
| <i>Lateral occipital cortex /precuneus / superior parietal lobule, BA 7</i> | <i>L</i> | <i>-10</i> | <i>-78</i> | <i>56</i>  | <i>5,25</i> | <i>16</i> |
| <i>Juxtapositional lobule, supplementary motor/premotor area, BA 6</i>      | <i>R</i> | <i>6</i>   | <i>4</i>   | <i>62</i>  | <i>5,25</i> | <i>39</i> |
| <i>Callosal body / frontal white matter</i>                                 | <i>L</i> | <i>-22</i> | <i>36</i>  | <i>14</i>  | <i>5,04</i> | <i>59</i> |
| <i>callosal body / frontal white matter</i>                                 | <i>L</i> | <i>-20</i> | <i>16</i>  | <i>32</i>  | <i>3,63</i> | <i>28</i> |
| <i>Callosal body</i>                                                        | <i>R</i> | <i>22</i>  | <i>34</i>  | <i>4</i>   | <i>4,06</i> | <i>52</i> |

---

Supplementary Table 6
